# Supplementary material
Source: HighWire-hosted journal article supplement (https://www.jneurosci.org/content/suppl/2009/12/02/29.48.15039)

SUPPL. FIG 1

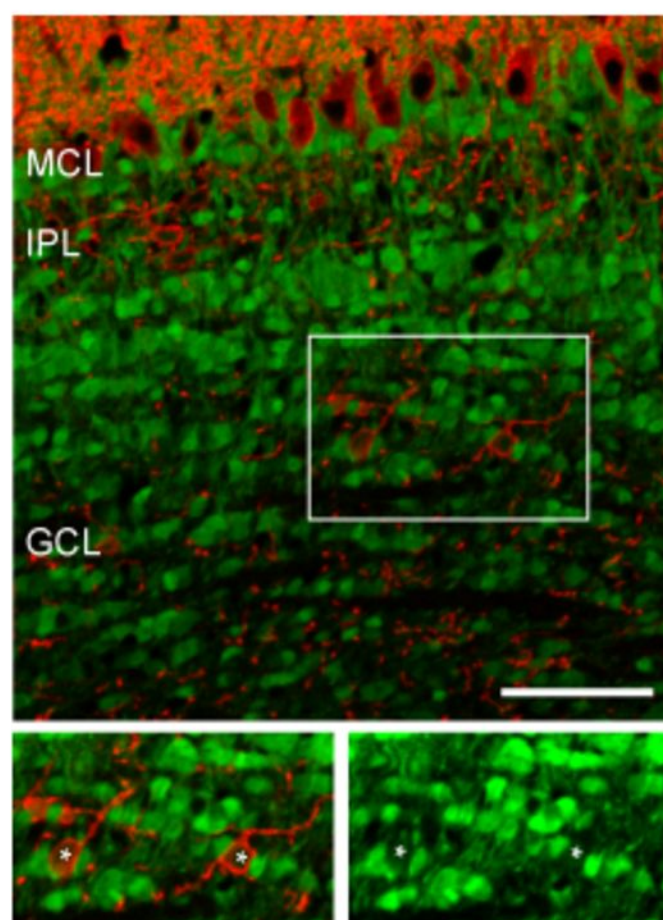

SUPPL. FIG 2

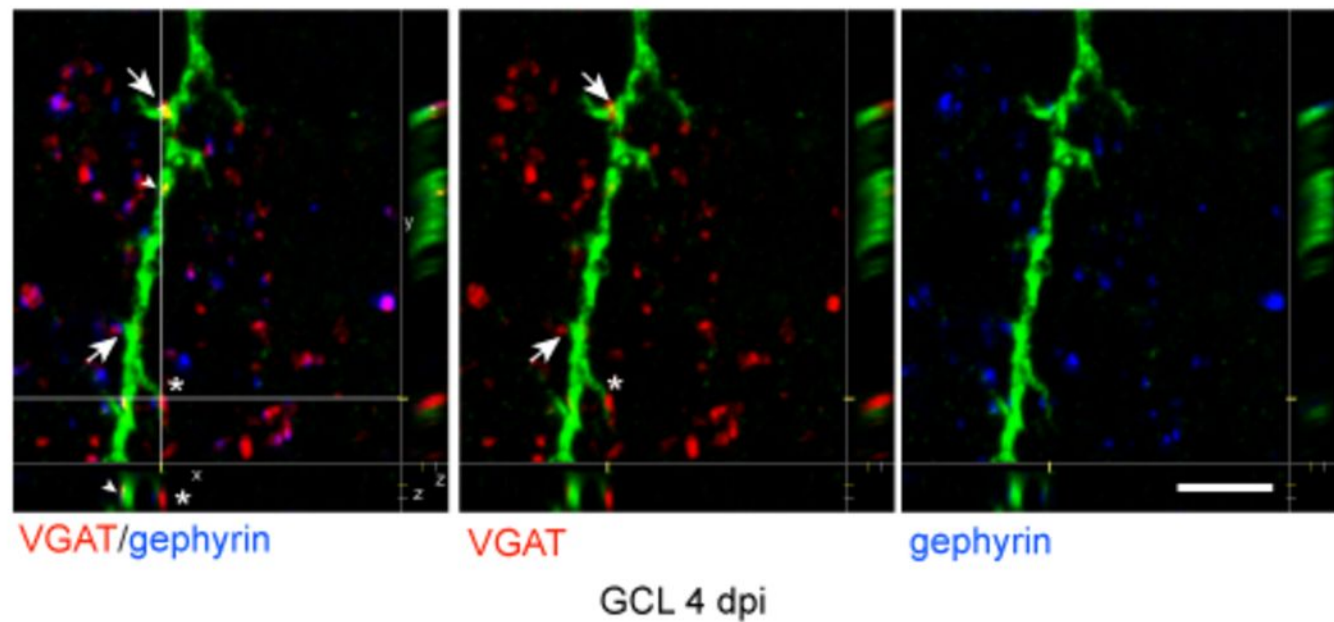

SUPPL. FIG 3

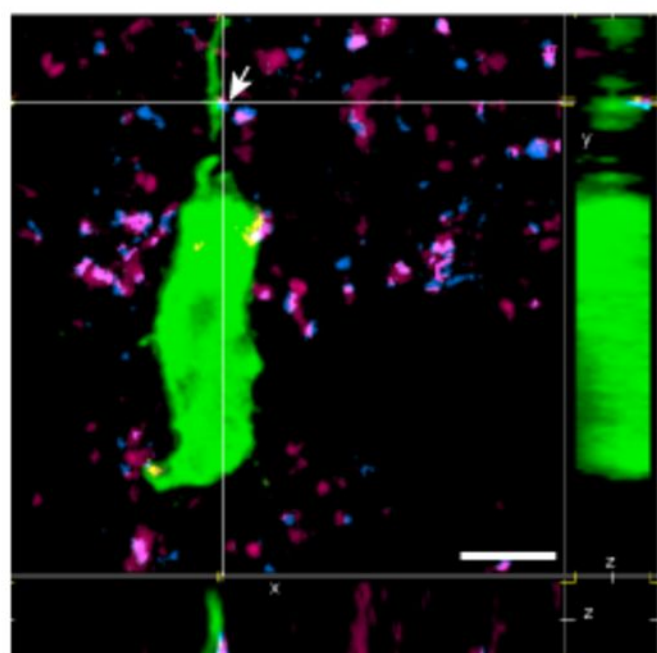

PSD-95/VGLUT1

GCL 3dpi

# SUPPL. FIG 4

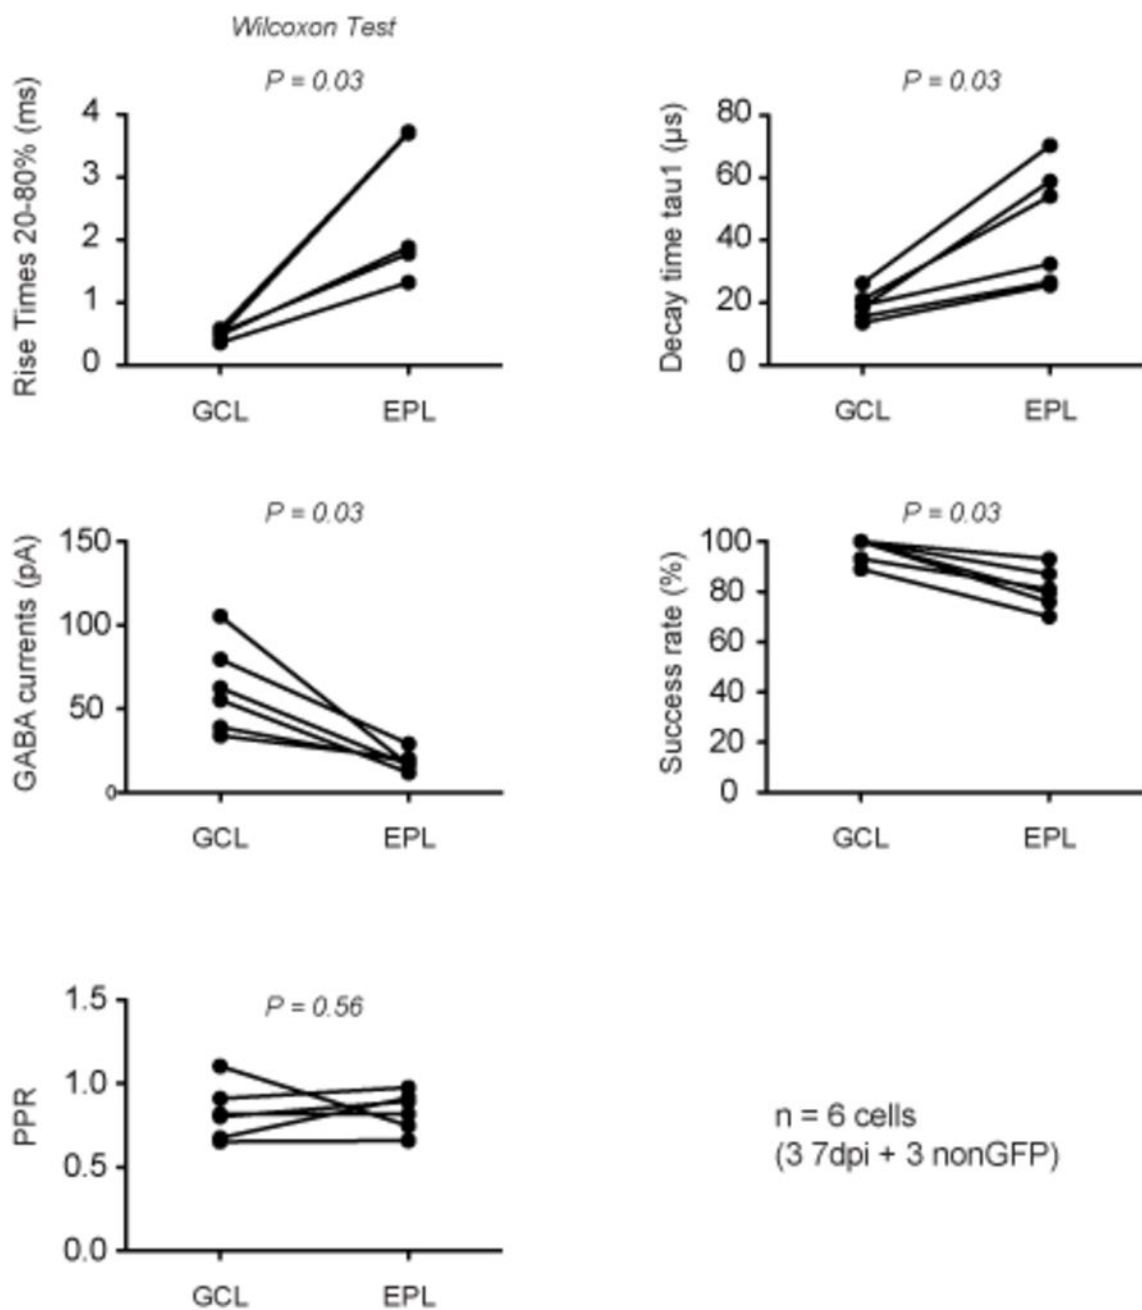

Supplement: Supplemental_Figures.pdf [file Supplemental_Figures.pdf]
